# Supplementary material for: Malaria is the Leading Cause of Acute Kidney Injury Among Children Undergoing Dialysis in Lusaka, Zambia: a Retrospective Study
Source: Research Square preprint supplement (doi:10.21203/rs.3.rs-2194048/v1), 2023-01-17
Supplement: Supplementary file 1 [file 64fd7c04e382985660f93443.xlsx]

## Sheet: aetiology and outcomes of AKI
subject study number	what quater of the year did patient present	What year quater did patient present?	Is the patient from lusaka province?	Reason for the Referral	Age of patient at presentation	age ategory	age categorised into 3 intervals for purpose of regression	Sex of Patient	Height of patient	Weight of patient	Duration of symptoms prior to presentation	was odema present	lowgcs?	presentedmacroscpichematuria	presentedoliguric?	presentedanuric?	fever at presentation?	Headacheyesorno	drug history prior to presentation	Was patient hypertensive at presentation	was the BP normal at last followup	Did patient have protinuria at presentation	Did patient have haematuria at admission	How many days did patient recieve peritoneal dialysis	what was the serum creatinineat last contact	what level of GFR did the patient have at last contact	what was outcome of treatment	how long did the patient stay in hospital	how many moths folllow up	Patient Outcome at last contact	consolidated patient outcome	Was patient outcome Bad or Good	Haemoglobin at admission	white cell count at admission	platelet count at admission	Serum sodium at admission	Serum potassium at admission	Serum creatinine at admission	what was the KDIGO2012 stage at presentation	Days to peak creatinine	what was the peak creatinine	what was the peak kdigo 2012 stage	Patient HIV status	Patient Hepatitis Bsurface antigen status	Patient Hepatitis C status	Patient syphyllis(RPR) status	Rapid malaria Test Result	Malaria parasite slide	KUB US echogenicity
159	2	2017B	1	aki	12.8	4	3	2	141	28	14	0	1	2	1	2	2	1	artesunate	2	4	2	2	32	432	5	2	39	220	7	4	1	5.8	10.6	529	127	33	1938	3	4	2350	3	2	2	2	2	1	3	1
209	1	2020A	0	pulmonary htn	0.4	2	1	2	59	5.5	3	1	2	2	2	1	1	2	enalapril,spiro,lasix,sildenafil	1	2	6	1	7	102	4	2	9	9	4	3	0	13.6	10.7	289	121	#NULL!	721	3	3	728	3	2	3	3	3	3	3	1
120	2	2018B	0	aki for dialysis	8	3	2	2	125	19	5	1	2	2	1	2	1	2	artesunate blood coartem	2	2	4	5	40	86	1	2	40	40	8	0	0	5	17.5	70	131	68	1054	3	9	1514	3	2	3	3	3	1	2	1
207	1	2016A	1	aki	4	2	1	1	97	14.8	4	1	2	2	2	1	2	2	ceftriaxone, furesemide	2	2	6	1	16	114	3	2	17	23	2	3	0	11.7	17	394	130	31	705	3	7	741	3	2	2	3	3	2	3	5
73	2	2018B	1	aki	4.8	2	1	1	106	14	#NULL!	1	2	2	2	1	2	2		#NULL!	#NULL!	#NULL!	#NULL!	17	72.4	1	2	17	270	8	0	0	4.5	14.6	220	144	#NULL!	1041	3	2	1130	3	2	2	3	3	1	3	5
71	3	2018C	1	aki	8	3	2	2	#NULL!	17	#NULL!	0	2	2	2	2	2	2		1	2	6	1	40	127	3	2	40	40	4	3	0	11.9	8.8	454	134	#NULL!	452	3	25	861	3	2	3	3	3	2	3	#NULL!
74	2	2018B	1	respirat distres	6	3	2	1	#NULL!	14.5	14	1	2	2	1	2	1	2	gentamicin,hrbal	2	1	3	5	14	33	1	2	18	50	2	0	0	3.4	14.2	57	148	32.2	398	3	3	609	3	2	2	3	2	2	3	1
158	2	2017B	1	aki	13	4	3	2	#NULL!	43	4	1	1	1	1	2	1	1	artesunatecefriaxone	2	1	6	1	14	55.6	1	2	16	425	8	0	0	11.3	13.2	42	#NULL!	#NULL!	474	3	11	1035	3	2	3	3	3	1	2	1
156	2	2017B	0	aki	4.8	2	1	2	#NULL!	22	21	1	2	2	1	2	2	2	morphine,,lasix,cefotaxime,BT	2	1	6	1	12	203	4	2	18	18	4	3	0	7.3	14	631	139	#NULL!	1190	3	10	1190	3	2	3	3	3	1	3	1
154	2	2017B	1	severe malaria	2.5	2	1	2	#NULL!	14	6	1	1	2	2	1	2	2	xpen,artesunate coatem	2	1	6	1	12	18	1	2	16	580	8	0	0	5	57	268	127	34.7	497	3	7	661	3	2	3	3	3	1	2	1
151	2	2017B	0	aki	11	4	3	1	139	32.2	30	1	2	2	2	1	1	2	coartem	1	2	2	5	39	717	5	1	91	118	7	2	1	3	7.5	205	102	111.9	1957	3	0	1957	3	2	2	3	2	1	1	3
149	4	2019D	0	aki	3.75	2	1	1	102	19.3	7	1	2	2	1	2	2	2	lasix atenolol,phenobarb	1	2	4	4	11	547.6	5	4	19	19	1	1	1	6	10.6	347	124	#NULL!	628	3	3	729	3	2	2	2	2	2	2	1
148	2	2019B	#NULL!		6	3	2	1	#NULL!	#NULL!	#NULL!	1	1	2	1	2	2	2		2	2	6	1	10	38.7	1	2	12	18	8	0	0	6.2	13.5	13	121	#NULL!	236	2	6	526	3	2	2	3	2	1	1	5
146	2	2018B	0	severe malaria	6	3	2	1	108	13.1	3	1	1	1	1	2	1	2	artesunate cefotaxime	2	2	6	1	18	80	1	2	19	31	8	0	0	11.2	12.5	33	134	#NULL!	80.5	4	9	927	3	2	3	3	3	1	3	5
144	2	2018B	0	aki	4	2	1	1	83	7.5	7	1	1	2	1	2	1	2		2	2	1	4	14	162	4	2	32	545	7	4	1	6.8	20.5	342	143	#NULL!	646	3	0	646	3	2	2	2	2	2	3	3
143	3	2017C	1	kidney stones	7	3	2	1	121	21	7	1	2	2	2	2	2	2	nalidic acid	2	2	1	2	1	80	1	2	9	1180	8	0	0	11.2	13.8	42	132	26.7	675	3	0	675	3	2	2	2	2	2	2	1
141	2	2018B	0	cerebral malaria	7	3	2	2	#NULL!	15.3	6	0	2	2	1	2	1	1	quinin, artesunate,coartem	2	2	6	1	7	32	1	2	11	22	8	0	0	8.5	19.6	44	113	#NULL!	448	3	2	618	3	2	3	3	3	1	3	1
14	1	2019A	0	nepro opinion	11	4	3	2	#NULL!	24.1	21	0	2	2	1	2	2	2	lasix,predni,ceftriaxone	2	1	3	5	58	640	5	1	59	59	7	2	1	8.8	4.6	132	137	#NULL!	847	3	2	930	3	2	2	2	2	1	3	1
65	2	2019B	0	aki	5	2	2	2	110	17	#NULL!	0	2	2	1	2	1	2		#NULL!	#NULL!	#NULL!	#NULL!	39	936	5	5	39	39	4	1	1	7.5	6.7	435	135	#NULL!	489	3	9	680	3	2	2	2	2	1	1	1
64	1	2018A	0	aki	11	4	3	2	#NULL!	24	6	0	2	2	1	2	1	2		2	2	6	1	16	62.3	1	2	19	43	8	0	0	8.8	14.4	52	133	56	1104	3	0	1104	3	2	2	3	2	1	2	5
51	1	2018A	0	aki	7	3	2	1	#NULL!	23.2	4	1	2	2	1	2	1	1		2	2	2	5	12	43	1	2	13	13	8	0	0	7.6	10	333	140	31	980	3	0	980	3	2	2	2	3	1	1	5
30	3	2019C	1	heart failure	10	3	2	2	#NULL!	24.5	5	0	2	2	1	2	2	2		1	2	1	2	26	112	3	2	27	360	2	3	0	7	9.4	76	#NULL!	#NULL!	978	3	0	978	3	2	3	3	3	3	2	1
168	1	2017A	1	aki	1.5	2	1	2	#NULL!	9.4	7	1	2	2	2	1	2	2	cefotaxime,lasix	2	4	6	1	4	42	1	2	13	54	8	0	0	6.6	24	905	142	17.6	540	3	0	540	3	2	3	3	3	2	3	1
167	1	2020A	0	aki	12	4	3	1	#NULL!	18.1	#NULL!	1	2	2	2	2	1	2	artesunate	2	4	6	1	19	34.8	1	2	38	57	8	0	0	9.1	7.7	48	#NULL!	12	370	3	15	479	3	1	3	3	3	1	2	1
170	1	2017A	1	aki	1.75	2	1	2	80	10.5	14	1	2	2	2	1	2	2	cefotaxime,prednisolone	2	2	1	4	17	48.9	1	2	31	485	8	0	0	7.2	16.5	644	139	#NULL!	1171	3	0	1171	3	2	2	3	2	3	2	1
20	2	2019B	1	aki 2 herbal	14	4	3	2	#NULL!	46	30	1	2	2	1	2	2	1	herbal	1	1	4	5	44	348	4	2	53	404	7	4	1	10.1	2.4	266	124	33.6	665	3	18	1069	3	2	2	3	2	2	3	3
178	2	2017B	0	aki	7	3	2	1	#NULL!	21	8	1	2	2	1	2	2	2	artesunate,lasix	2	2	3	5	16	137	3	2	20	21	4	3	0	7.5	13.6	30	114	#NULL!	823	3	2	845	3	2	3	3	2	1	2	1
129	2	2017B	0	aki	9	3	2	1	#NULL!	28	30	1	2	2	1	2	2	2	nifedipine	1	1	2	4	20	80.3	1	2	55	55	8	0	0	10.8	8.23	465	#NULL!	#NULL!	1092	3	1	1134	3	2	2	2	2	2	3	#NULL!
115	4	2017D	1	severe malaria	8	3	2	1	#NULL!	20	3	0	2	1	2	2	1	2	artesunate	2	2	5	5	17	107	3	2	18	18	2	3	0	5.7	15.6	187	137	#NULL!	653	3	10	884	3	2	2	3	2	1	3	5
104	3	2018C	0	aki	2	2	1	1	#NULL!	13	6	1	2	2	2	1	1	2	pen v,amoxyl	1	2	6	1	16	37.6	1	2	33	33	8	0	0	6.3	24.1	763	139	43	1195	3	0	1195	3	2	3	3	3	3	3	1
97	4	2018D	0	aki	7	3	2	1	120	20.8	8	1	2	2	1	2	1	2	artesunate, coartem	2	2	6	1	23	82	1	2	24	24	8	0	0	6.4	19.3	437	#NULL!	80.2	1053	3	4	1011	3	2	2	2	2	1	3	1
102	3	2018C	1	aki	4	2	1	2	#NULL!	15.2	5	1	2	2	1	2	1	2	artesunate, cefotaxime	2	4	6	1	21	45	1	2	28	28	8	0	0	7.9	14.9	104	131	#NULL!	269	3	5	632	3	2	3	3	3	1	2	5
11	1	2019A	1	nephrotic syndro	8	3	2	2	117	23.3	10	1	2	1	1	2	2	2	brufen,coatem, erythromicin	1	2	3	3	31	43	1	2	34	165	8	0	0	6.5	13.6	233	#NULL!	#NULL!	293	3	9	330	3	2	2	3	2	1	3	1
82	2	2018B	0	aki	12	4	3	1	#NULL!	19.2	21	0	2	2	2	1	2	2	artesunate,coartem	1	2	1	2	4	79	1	2	11	19	8	0	0	8	14.9	406	130	#NULL!	798	3	-2	1186	3	2	3	3	3	1	3	1
75	2	2018B	0	aki	3	2	1	2	#NULL!	12	6	1	2	2	2	1	2	2	herbal,cefotaxime,lasix	1	1	6	1	12	66	1	2	16	25	8	0	0	11	15.1	266	132	48	811	3	2	932	3	2	3	3	2	1	3	3
78	2	2018B	0	aki	4	2	1	2	#NULL!	12	3	1	2	2	2	1	1	2	artesunate	1	2	3	5	7	82	1	2	13	13	8	0	0	5.8	36.9	75	140	#NULL!	1045	3	1	1045.6	3	2	3	3	3	1	1	1
81	2	2018B	0	anuria/malaria	10	3	2	1	#NULL!	20	5	0	2	1	1	2	2	2	coartem	1	2	4	5	17	62	1	2	18	28	8	0	0	9.8	25.4	74	#NULL!	67	1045	3	3	1067	3	2	2	2	3	1	2	3
6	2	2019B	0	aki	4	2	1	2	#NULL!	18.1	14	1	2	2	1	2	1	1	coartem	2	2	2	2	19	219	4	2	21	21	4	3	0	5.3	12	610	133	#NULL!	1337	3	0	1337	3	2	2	2	3	1	2	1
1	2	2019B	0	aki	5	2	2	2	#NULL!	13.5	3	1	2	2	2	2	1	2	quinin,promethazine	2	2	2	3	47	348	4	2	48	61	7	4	1	5.2	19	75	134	#NULL!	936	3	0	936	3	2	2	2	3	1	2	5
179	2	2017B	0	abdominal trauma	7	3	2	1	#NULL!	26.1	1	1	2	2	2	1	2	2	x-pen,gentamicin,flagyl	1	2	6	1	31	1118	5	1	31	31	7	2	1	13.4	21.6	574	#NULL!	17.4	888	3	18	1118	3	2	3	3	3	3	3	#NULL!
187	1	2020A	1	aki	0.5	1	2	2	#NULL!	5.39	3	1	1	2	2	1	2	2	cefotaxime,flagyl	1	157	136	1	2	195	5	4	3	3	1	1	1	4	44	776	#NULL!	13	191	3	3	195	3	2	3	3	3	3	3	#NULL!
169	1	2017A	1	severemalaria	8	3	2	1	134	19	3	0	1	2	1	2	2	2	coartem	2	2	6	1	7	54	1	2	18	98	8	0	0	5.7	16.8	54	131	38.6	317	3	7	688	3	2	2	2	3	1	3	1
3	2	2019B	1	aki	10	3	2	2	132	32.4	14	1	2	2	1	2	2	2	artesunate,cefotaxime	2	2	3	5	403	426	5	3	58	403	5	4	1	10.3	6.58	423	118	60	1642	3	2	1642	3	2	2	2	2	1	2	1
239	1	2020A	1	severe malaria	14	4	3	2	#NULL!	46.2	1	0	2	1	2	2	2	1		2	2	4	5	9	90.5	1	2	20	23	8	0	0	5.6	9	44	#NULL!	19	139	2	9	1166	3	2	2	2	3	1	1	3
235	2	2020B	0	aki	10	3	2	1	122	24.5	11	1	2	2	2	1	2	1	quinin, artesunate,coartem	2	2	6	1	41	774	5	2	47	102	7	4	0	7.5	18.6	121	117	#NULL!	1325	3	2	1395	3	1	3	3	3	3	2	3
236	1	2020A	0	aki	12	4	3	1	#NULL!	28	21	0	2	2	2	1	2	2	artesunate	2	2	6	1	119	426	5	3	87	350	1	1	1	6.8	8.7	434	#NULL!	#NULL!	1919	3	0	1919	3	2	3	3	3	1	2	3
234	2	2020B	1	aki	13	4	3	1	#NULL!	56	21	1	2	1	2	1	2	2	coartem	1	2	6	1	14	157	3	2	22	105	2	3	0	6.7	11.5	430	126	#NULL!	1878	3	0	1878	3	2	3	3	3	1	2	1
245	2	2020B	0	gastc outletobst	5	2	2	2	106	14.9	28	1	2	2	1	1	2	1	hydroxyurea,deltaprim	2	2	3	5	10	718	5	5	10	10	3	5	1	4	3.59	106	135	#NULL!	537	3	5	718	3	2	2	3	2	2	3	3
246	1	2020A	0	aki	7	3	2	1	113	24.1	14	1	2	2	1	2	2	2	ceftriaxone,artesunate,coartem	2	2	1	2	17	210	4	2	18	34	4	3	0	9.9	14.4	619	#NULL!	#NULL!	1024	3	0	1024	3	2	3	3	3	1	2	3
247	1	2020A	0	aki	6	3	2	1	#NULL!	22	4	1	2	2	2	1	2	2	coartem,artesunate	1	2	2	2	34	192	4	2	34	34	3	3	0	11.5	8.4	668	#NULL!	27.8	780	3	1	780	3	2	3	3	3	1	2	1
270	2	2020B	0	aki	8	3	2	1	104	14.7	7	1	2	1	1	2	1	1	quinin	2	2	6	1	28	53	1	2	46	110	2	0	0	#NULL!	#NULL!	#NULL!	131	#NULL!	650	3	0	650	3	1	3	3	3	1	2	5
268	1	2020A	0	aki	7	3	2	1	118	23.5	14	1	2	2	2	1	2	1	coartem	1	4	3	2	68	609	5	1	78	78	7	2	1	6.4	4.4	298	#NULL!	46.2	1049	3	0	1049	3	2	3	3	3	1	2	3
266	1	2020A	0	aki	3	2	1	2	92	12.7	14	1	2	2	2	1	1	2	herbal,coartem,artesunate,cefo	2	2	3	2	6	61	1	2	12	12	8	0	0	7.1	6.1	264	#NULL!	40	631	3	0	631	3	2	2	2	2	1	2	5
263	2	2020B	1	aki	7	3	2	2	#NULL!	17	6	1	2	2	1	2	2	1	artesunate,xpen	2	2	1	1	11	43	1	2	17	37	8	0	0	4.2	20.4	70	124	#NULL!	502	3	2	553	3	2	3	3	3	1	2	5
262	1	2020A	0	aki	3.9	2	1	1	104.2	19	30	1	2	1	1	2	2	2		1	2	1	2	69	53	1	2	69	119	8	0	0	9.4	12.6	492	#NULL!	46.5	1367	3	0	1367	3	2	3	3	3	3	3	1
260	1	2020A	0	aki	11	4	3	2	158	47.7	7	0	1	2	2	1	2	2	diclofenac,coartem,artesunate	2	2	6	1	14	112	3	2	15	20	2	3	0	8.9	18.9	115	#NULL!	35	1040	3	5	1091	3	2	3	3	3	1	2	5
259	1	2020A	0	aki	10	3	2	2	#NULL!	20.9	3	0	1	1	2	2	2	1	artesunate,coartem	2	2	6	1	14	58	1	2	14	19	2	0	0	11.6	12.6	45	#NULL!	#NULL!	186	2	4	653	3	2	3	3	3	2	2	3
290	1	2021A	0	aki	5.5	3	2	1	#NULL!	21	8	0	1	2	1	2	2	2	artesunate, AZT,3TC,DTG	2	2	6	1	11	125	3	2	11	11	4	3	0	3.9	56.3	196	#NULL!	100	1321	3	0	1321	3	2	3	3	3	1	2	3
294	1	2021A	0	aki	11	4	3	2	129.5	28.4	7	1	2	2	1	2	2	2	artesunate	2	2	4	5	12	153	3	2	12	40	4	3	0	7.3	20.1	471	#NULL!	#NULL!	1465	3	3	1557	3	2	2	3	2	1	1	5
296	1	2021A	0	aki	8	3	2	2	116	21	14	1	2	2	2	1	2	2	artesunate, coatem	2	2	6	1	22	193	4	2	23	27	4	3	0	8.4	13.7	253	130	63	1038	3	1	1038	3	2	3	3	3	1	2	3
298	1	2021A	1	aki	5	2	2	2	156	22	5	1	2	2	2	1	2	2		1	2	6	1	14	212	4	2	60	65	7	4	1	6.9	8	337	#NULL!	#NULL!	1191	3	1	1191	3	2	2	2	2	2	2	1
305	1	2021A	0	aki	5	2	2	1	#NULL!	17.4	8	1	2	2	2	1	2	2	artesunate	2	2	3	5	43	918	5	1	63	63	7	2	1	6.1	14.9	487	133	40.8	901	3	1	901	3	2	2	2	3	1	2	1
310	2	2021A	0	aki	4	2	1	1	#NULL!	14.8	4	1	1	2	2	2	2	2	artesunate, mebendazole	2	4	6	1	7	799	5	2	18	18	3	5	1	5.5	7.9	32	#NULL!	19	780	3	0	780	3	2	2	3	2	1	2	5
313	2	2021B	0	aki	5	2	2	1	105	20.2	14	1	2	2	2	1	2	2	antimalarial	2	2	2	4	9	165	4	2	13	20	2	3	0	6	13.7	708	#NULL!	#NULL!	1053	3	5	1081	3	2	3	3	3	1	3	3
316	3	2020C	0	aki	7	3	2	2	121	27.5	21	1	2	2	1	2	2	2	prdnsolone	1	1	3	5	38	610	5	1	38	38	7	2	1	5.6	13.7	215	132	47	1150	3	0	1150.8	3	2	2	3	3	2	2	1
324	3	2021C	0	aki	13	4	3	1	142	39.3	14	1	2	2	1	2	2	2	xpenicillin, nifedipine,lasix	1	2	6	1	36	768	5	1	63	77	7	2	1	6.9	11.3	118	139	47	1742	3	0	1742	3	2	3	3	3	3	3	3
340	2	2018B	1	aki	11	4	3	1	#NULL!	17	7	0	2	2	2	2	2	2		2	2	1	2	0	33	1	2	8	12	8	0	0	9	15.7	584	132	20	628	3	1	682	3	1	2	2	2	2	3	1
55	1	2018A	1	heart failure	11	4	3	2	#NULL!	35	3	0	2	2	2	2	2	2		1	1	3	2	0	104	2	2	15	45	3	3	0	14.1	5.02	366	142	19	150.6	2	0	151	2	2	2	2	3	2	2	3
56	1	2018A	1	aki	6	3	2	2	#NULL!	22	4	0	1	2	2	2	1	1	cefotaxime, artesunate,coartem	2	2	6	1	0	44	1	2	9	35	8	0	0	7.8	12.8	186	138	62	658	3	1	658	3	2	2	2	3	1	2	5
58	1	2018A	1	severe pneumonia	12	4	3	1	154	55	6	0	2	2	2	2	1	1	cefotaxime,hydrocortisone	2	2	6	1	0	59	1	2	15	750	8	0	0	9	15.2	43	135	9.4	84	4	6	886	3	2	3	3	3	1	2	5
330	4	2021D	1	aki	0.8	1	1	1	#NULL!	7.2	30	0	2	2	2	1	1	2	dopamine,ciprobid,cefotaxime	2	2	6	1	6	120	4	2	6	27	2	3	0	3.6	35	290	#NULL!	#NULL!	594	3	0	594	3	2	2	2	3	3	3	1
336	1	2021A	0	aki	6	3	2	1	119	25.3	16	1	2	2	1	2	2	2	coartem,artesunate	2	2	3	5	21	1066	5	2	22	89	1	1	1	6.7	21	594	#NULL!	#NULL!	1319	3	3	1371	3	2	3	3	3	1	2	1
337	2	2021B	1	aki	11	4	3	2	154	45.5	4	1	2	2	1	2	2	2	lasix	1	#NULL!	4	5	1	398	5	4	2	2	1	1	1	10.9	15	302	#NULL!	#NULL!	390	3	1	398	3	2	3	3	3	2	3	5
248	1	2020A	0	aki	9	3	2	1	#NULL!	23.6	14	1	2	2	2	1	2	2	artesunate,coartem,lasix	2	2	3	5	39	421	5	3	39	170	5	1	1	6.5	11.5	758	#NULL!	65	1230	3	1	2059	3	2	3	3	3	1	2	1
15	1	2019A	0	severe malaria	16	4	3	2	#NULL!	52	6	0	2	2	2	2	2	2	quinine,flagyl	2	2	1	2	3	76	1	2	24	120	8	0	0	5.9	10.2	163	128	#NULL!	1137	3	5	1540	3	2	2	3	3	2	2	3
345	1	2019A	0	ADH had no cathe	6	3	2	1	110	20.3	18	1	2	2	2	1	2	1	quinine,artesunate,coartem ,para	2	2	4	2	16	603	5	2	23	330	7	4	1	7.1	9.6	537	#NULL!	37.6	1158	3	3	1336	3	2	3	3	3	1	2	1
304	1	2021A	0	aki	4	2	1	1	94	16.3	4	1	1	1	1	2	2	2	artesunate,lasix	2	1	4	5	0	154	4	2	7	7	4	3	0	6.1	29.3	197	125	33	685	3	0	685	3	2	3	3	3	1	1	5
301	1	2021A	0	ckd run out supp	15	4	3	2	#NULL!	53.5	10	1	2	2	1	1	2	1		2	2	1	4	0	263	4	2	7	7	4	3	0	5.3	12.1	255	#NULL!	38	794	3	-1	1052	3	2	3	3	3	1	2	1
285	2	2020B	1	severe malaria	16	4	3	1	#NULL!	55.4	4	0	2	1	2	2	1	2	artesunate	2	2	4	2	0	55	1	2	15	23	8	0	0	10.7	2.7	17	#NULL!	#NULL!	267	3	2	374	3	2	3	3	3	1	3	1
284	4	2020D	0	dialysis	5.2	3	2	1	#NULL!	17.4	14	1	2	1	1	2	1	2	nifedipine	1	2	6	1	0	443	5	2	9	9	4	3	0	6.4	12	1011	#NULL!	#NULL!	1109	3	0	1109	3	2	3	3	3	1	2	1
288	4	2020D	0	aki	12	4	3	1	#NULL!	26.1	5	0	2	1	2	2	1	1	flagyl, cipro	2	2	6	1	0	70	1	2	16	21	8	0	0	6.8	33	217	126	#NULL!	1046	3	0	1046	3	2	2	3	3	2	3	1
287	4	2020D	0	aki	15	4	3	2	#NULL!	59.2	21	1	2	2	1	2	2	2	herbal	2	2	6	1	0	265	4	2	12	12	4	3	0	7.2	33	365	126	#NULL!	1788	3	0	1788	3	2	3	3	2	2	2	1
286	4	2020D	0	aki	15	4	3	2	#NULL!	51	3	0	2	2	1	2	1	2	artesunate,lasix	2	2	4	5	0	239	4	2	12	12	4	3	0	7.7	11.7	95	137	48	793	3	5	1073	3	2	2	2	2	1	2	5
276	4	2020D	0	PUV	7	3	2	1	#NULL!	15.6	270	0	2	2	2	2	2	2	cefotaxime	2	2	3	2	0	87	1	2	26	26	8	0	0	6.4	15.5	674	#NULL!	46	684	3	0	684	3	2	3	3	3	3	3	1
302	2	2021B	1	aki	9	3	2	1	#NULL!	21.3	6	1	2	2	2	2	1	2	flagyl,xpen,lasix,omeprazole	2	2	3	3	0	44.8	1	2	17	17	8	0	0	2.3	11	395	#NULL!	#NULL!	1346	3	0	1346	3	2	2	3	3	2	3	3
376	2	2021B	0	aki	5	2	2	1	51.8	16	7	0	2	2	2	2	1	1	artesunate	2	1	6	1	0	171	5	2	7	7	4	3	0	2	21.7	270	#NULL!	#NULL!	403	3	-2	628	3	2	3	3	3	1	2	3
306	2	2020B	1	severe malaria	12	4	3	2	#NULL!	34	3	0	2	1	2	2	1	1	artesunate	2	2	6	1	0	60	1	2	16	16	8	0	0	4.8	18.5	96	#NULL!	#NULL!	417	3	6	901.6	3	2	3	3	3	1	2	5
315	2	2021B	1	severe malaria	12	4	3	2	#NULL!	26	3	0	2	1	2	2	2	1	coartem	2	2	6	1	0	1042	5	2	17	17	2	5	1	9.5	8.2	71	#NULL!	#NULL!	566	3	12	1676	3	2	3	3	3	1	1	3
396	4	2021D	1	anaemia	5	2	2	2	106	15.6	6	0	2	2	2	2	1	1	coartem, cetrizin ,flagyl	2	2	6	1	12	182	4	2	26	110	7	4	0	6.2	22	146	#NULL!	#NULL!	879	3	1	1324	3	2	3	3	3	1	2	5
317	3	2021C	0	AGN/scabies	8	3	2	1	127	27.5	14	1	2	2	1	2	2	2	nifedipine,lasix,benzyl benzoate	1	2	4	5	0	45	1	2	13	265	2	0	0	9.8	9.6	454	138	#NULL!	344	3	8	454	3	2	3	3	3	2	3	3
381	3	2021C	0	heart disease	7	3	2	1	119.3	25	14	1	2	1	1	2	2	2		2	2	6	1	0	468	4	2	47	364	7	4	1	9.1	23.4	188	#NULL!	39.1	405.7	3	1	415	3	2	2	3	3	2	2	1
378	2	2021B	0	aki	4	2	1	1	#NULL!	15.1	21	1	2	2	2	2	2	2	nifedipine,enalapril,lasix,amoxy	1	2	4	5	5	23	1	2	26	30	2	0	0	6.6	17.8	314	141	#NULL!	487	3	0	545	3	2	3	3	3	1	3	1
314	2	2021B	1	aki	13	4	3	1	#NULL!	32.6	7	1	2	2	2	2	1	2	artesunate,quinine	1	2	1	1	0	294	4	2	3	8	2	3	0	5.9	6.8	77	137	#NULL!	759	3	0	759	3	2	3	3	3	1	2	1
372	1	2021A	1	brake fluid inge	14	4	3	2	#NULL!	45.5	3	0	2	2	2	2	2	2		2	2	4	5	0	173	3	2	15	15	2	3	0	15.8	42	337	141	9	189	2	9	1232	3	2	2	3	3	3	3	5
324	3	2021C	0	PSAGN	13	4	3	1	#NULL!	39.3	14	1	2	2	1	2	2	2	nifedipine,lasix	1	2	4	3	50	768	5	1	77	77	7	2	1	6.9	11.3	118	#NULL!	#NULL!	1742	3	0	1742	3	2	3	3	3	2	3	3
174	1	2017A	0	aki	8	3	2	2	#NULL!	25	14	1	2	2	2	1	2	2	ciprobid,hloramphenical	2	2	1	2	0	175	3	2	24	24	2	3	0	7.3	5.8	668	132	61	560	3	0	550	3	2	2	2	2	2	3	1
185	1	2017A	1	aki	10	3	2	1	#NULL!	#NULL!	14	1	1	2	1	2	1	1	coartem	2	2	6	1	0	42	1	2	11	270	2	0	0	4.8	3.6	69	135	31	602	3	3	987	3	2	2	2	3	1	3	1
408	4	2021D	0	dialysis	9	3	2	1	#NULL!	28.7	14	1	2	2	2	1	2	2	herbal	1	1	6	1	60	903	5	1	30	40	7	2	1	4.5	6	340	138	53	1455	3	0	1497	3	2	3	3	3	1	2	1
401	4	2021D	0	aki	7	3	2	1	119	20.1	10	1	2	2	2	1	2	2	artesunate	2	2	6	1	0	142	3	2	11	11	2	3	0	8.3	7.2	511	137	#NULL!	1314.8	3	0	1315	3	2	3	3	3	1	2	1
340	2	2018B	1	aki	11	4	3	1	#NULL!	17	7	0	2	2	2	2	2	2		2	2	1	2	0	64	1	2	8	12	2	0	0	9	15.7	584	129	20	344	3	1	682	3	1	2	2	2	2	3	1
281	4	2020D	0	aki	13	4	3	1	154.5	44.7	4	0	2	2	2	1	2	2		1	1	6	1	0	137	3	2	12	12	4	3	0	9.9	10.7	122	134	#NULL!	618	3	7	1148	3	2	3	3	3	3	3	3
280	4	2020D	0	severe anaemia	4.8	2	1	2	108	18.8	7	1	2	2	2	2	1	2	quinine,flagyl	2	2	6	1	0	51	1	2	14	27	4	0	0	7.1	21	87	#NULL!	46	733	3	10	918	3	2	3	3	3	1	3	1
370	3	2020C	0	for fbc	7	3	2	2	#NULL!	23.5	28	1	2	2	2	2	2	2	coartem,prednisolone	1	1	4	5	42	547	5	5	41	41	3	5	1	4.6	11.1	525	#NULL!	28	869	3	6	1006	3	2	3	3	3	2	3	3
295	1	2021A	1	CKD	2.5	2	1	1	#NULL!	13.3	7	0	2	2	2	2	2	2		2	2	6	1	0	76	1	2	10	100	8	0	0	5.1	20.9	1631	#NULL!	#NULL!	615	3	0	615	3	2	3	3	3	3	3	1
130	3	2017C	1	aki	0.3	1	1	1	#NULL!	6.2	7	0	2	2	2	1	2	2	herbal	2	4	6	1	0	2.2	1	2	20	260	8	0	0	9.7	22.7	281	185	#NULL!	756	3	0	756	3	2	2	3	3	2	2	3
180	1	2017A	1	aki	7	3	2	1	#NULL!	26	5	1	2	2	2	1	2	2	artesunate,paracetamol, xpen	2	2	6	1	10	65	1	2	20	35	8	0	0	10.5	4.5	119	127	65	980	3	1	1086	3	2	2	3	3	1	2	1
147	1	2019A	0	aki	10	3	2	1	124	22.8	12	0	2	1	2	2	2	2	coartem	2	1	3	2	0	115	3	2	8	8	4	3	0	6.7	16.5	991	140	#NULL!	542	3	0	542	3	2	3	3	3	1	3	1
319	3	2021C	1	aki	6	3	2	1	108	22.1	6	1	2	1	2	2	2	2		1	2	3	5	0	49	1	2	6	38	2	0	0	#NULL!	#NULL!	#NULL!	#NULL!	9.4	101	1	4	139	2	2	#NULL!	#NULL!	#NULL!	2	#NULL!	3
237	2	2020B	0	aki glomerulonep	11	4	3	1	134	32	21	1	2	1	2	2	2	2		1	1	3	5	0	312	4	2	39	345	2	3	0	9.6	24	701	137	#NULL!	219	3	9	269	3	2	2	2	2	2	#NULL!	3
125	2	2017B	0	aki	9	3	2	1	121	21	14	1	2	2	2	2	1	2	coartem,quinine	2	2	1	5	8	85	1	2	17	17	8	0	0	5	8	389	#NULL!	#NULL!	1506	3	0	1506	3	2	2	2	2	1	2	1
350	3	2020C	0	SLE with SRNS	13	4	3	2	149	49.6	7	1	2	2	2	2	2	1	methotrexate	1	1	4	4	0	45	1	2	9	720	8	0	0	8	7.6	138	124	#NULL!	307	3	0	307	3	2	2	2	3	2	2	1
106	4	2017D	1	aki	3	2	1	1	#NULL!	12	14	1	2	2	2	2	1	2	xpen,folate,paracetamol	1	2	5	4	0	87	1	2	23	250	8	0	0	6.8	9.9	510	136	23	364	3	-1	615	3	2	3	3	2	3	2	1
131	4	2017D	0	CKD	14	4	3	2	149	52	8	1	2	2	2	2	1	2	ceftriaxone	1	2	1	2	0	299	4	2	73	82	7	4	1	4.8	13.1	246	142	41	904.8	3	-1	1033	3	2	2	2	2	2	3	3
59	1	2018A	1	macroscopic haem	14	4	3	2	#NULL!	33.5	30	0	2	1	2	2	2	1		2	2	1	2	0	65	1	2	9	31	8	0	0	9.3	4.5	322	135.2	18.2	597	3	0	597	3	2	2	3	2	2	2	1
343	4	2019D	0	aki	14	4	3	1	155	43	60	0	2	2	1	2	2	2	antituberculous drugs	2	2	3	5	5	427	4	2	35	56	3	5	1	6.5	27	444	139	29	757	3	0	757	3	2	2	3	2	2	#NULL!	1
342	4	2019D	0	aki	3	2	1	1	#NULL!	16	5	0	1	1	2	2	1	2	artesunate,phenobarb	2	2	6	1	1	23	1	2	14	14	8	0	0	#NULL!	#NULL!	#NULL!	130	35	747	3	0	747	3	2	3	3	3	1	2	5
341	4	2019D	0	aki	5	2	2	1	102	17.6	5	1	2	2	2	1	1	1	ABC,£TC,EFV,artesunate,coartem	2	2	6	1	0	170	4	2	13	13	4	3	0	4.5	14.5	272	#NULL!	#NULL!	972	3	5	1483	3	1	3	3	3	1	1	3
250	1	2020A	0	aki	5	2	2	1	115	17.3	2	0	2	2	2	2	1	2	artesunate,quinine	2	2	2	4	0	76	1	2	5	5	8	0	0	12.5	9.7	348	#NULL!	#NULL!	252	2	0	252	2	2	3	3	3	1	2	5
124	2	2017B	1	aki	8	3	2	1	114	21	7	1	2	2	2	2	2	2		1	1	3	4	0	63	1	2	5	7	8	0	0	11.2	7	539	138	42	379.9	3	0	380	3	2	3	3	3	2	3	5
249	1	2020A	1	cerebral malaria	7	3	2	1	128	25	7	0	2	2	2	2	1	1	artesunate,diazepam	2	2	6	1	18	48.5	1	2	20	25	8	0	0	8	3.58	25	#NULL!	#NULL!	217	3	5	851	3	2	3	3	3	3	1	5
251	1	2020A	0	aki	15	4	3	1	#NULL!	52.6	10	0	2	1	1	2	1	2	artesunate	1	1	6	1	11	67	1	2	14	45	8	0	0	10	12.5	230	#NULL!	35	1631	3	3	1734	3	2	3	3	3	1	1	1
252	2	2020B	0	aki	12	4	3	1	120	21.3	7	1	2	2	1	2	1	1	artesunate,coartem,ceftriaxone	2	2	2	5	15	221	2	2	16	16	4	3	0	6.3	8.1	882	129	#NULL!	1776	3	0	1776	3	2	3	3	3	1	2	5
253	4	2017D	0	aki	3	2	1	2	83	10.5	3	1	2	2	2	2	1	2	cortem	2	2	6	1	18	50	1	2	19	19	8	0	0	6.1	11	123	133	#NULL!	651	3	2	661	3	2	3	3	3	1	2	1
267	2	2020B	0	aki	10	3	2	1	122	24.5	7	0	2	2	2	1	2	2		2	2	6	1	40	774	5	2	55	94	7	4	1	7.5	18.5	121	117	#NULL!	1325	3	1	1345	3	1	3	3	3	1	2	3
328	1	2021A	0	aki	12	4	3	2	#NULL!	41.6	12	1	2	2	2	2	2	1	nifedipine,lasix,paracetamol	1	1	4	4	21	1215	5	5	26	26	3	5	1	6.6	10	170	#NULL!	#NULL!	1864	3	5	2270	3	2	2	2	3	2	3	1
409	4	2021D	1	nephrotic syndro	14	4	3	2	135	30.9	300	1	2	2	2	2	2	2	prednisolone,lasix	1	1	4	5	39	486	5	1	46	60	9	2	1	#NULL!	#NULL!	#NULL!	144	21	680	3	5	915	3	2	2	3	3	2	3	1
[truncated: 7 more columns]
